# Supplementary material for: Negative Regulation of the Differentiation of Flk2− CD34− LSK Hematopoietic Stem Cells by EKLF/KLF1
Source: PubMed Central journal article supplement (PMC7697791; doi:10.3390/ijms21228448), 2020-11-10
Supplement: ijms-21-08448-s001.pdf [file ijms-21-08448-s001.pdf]

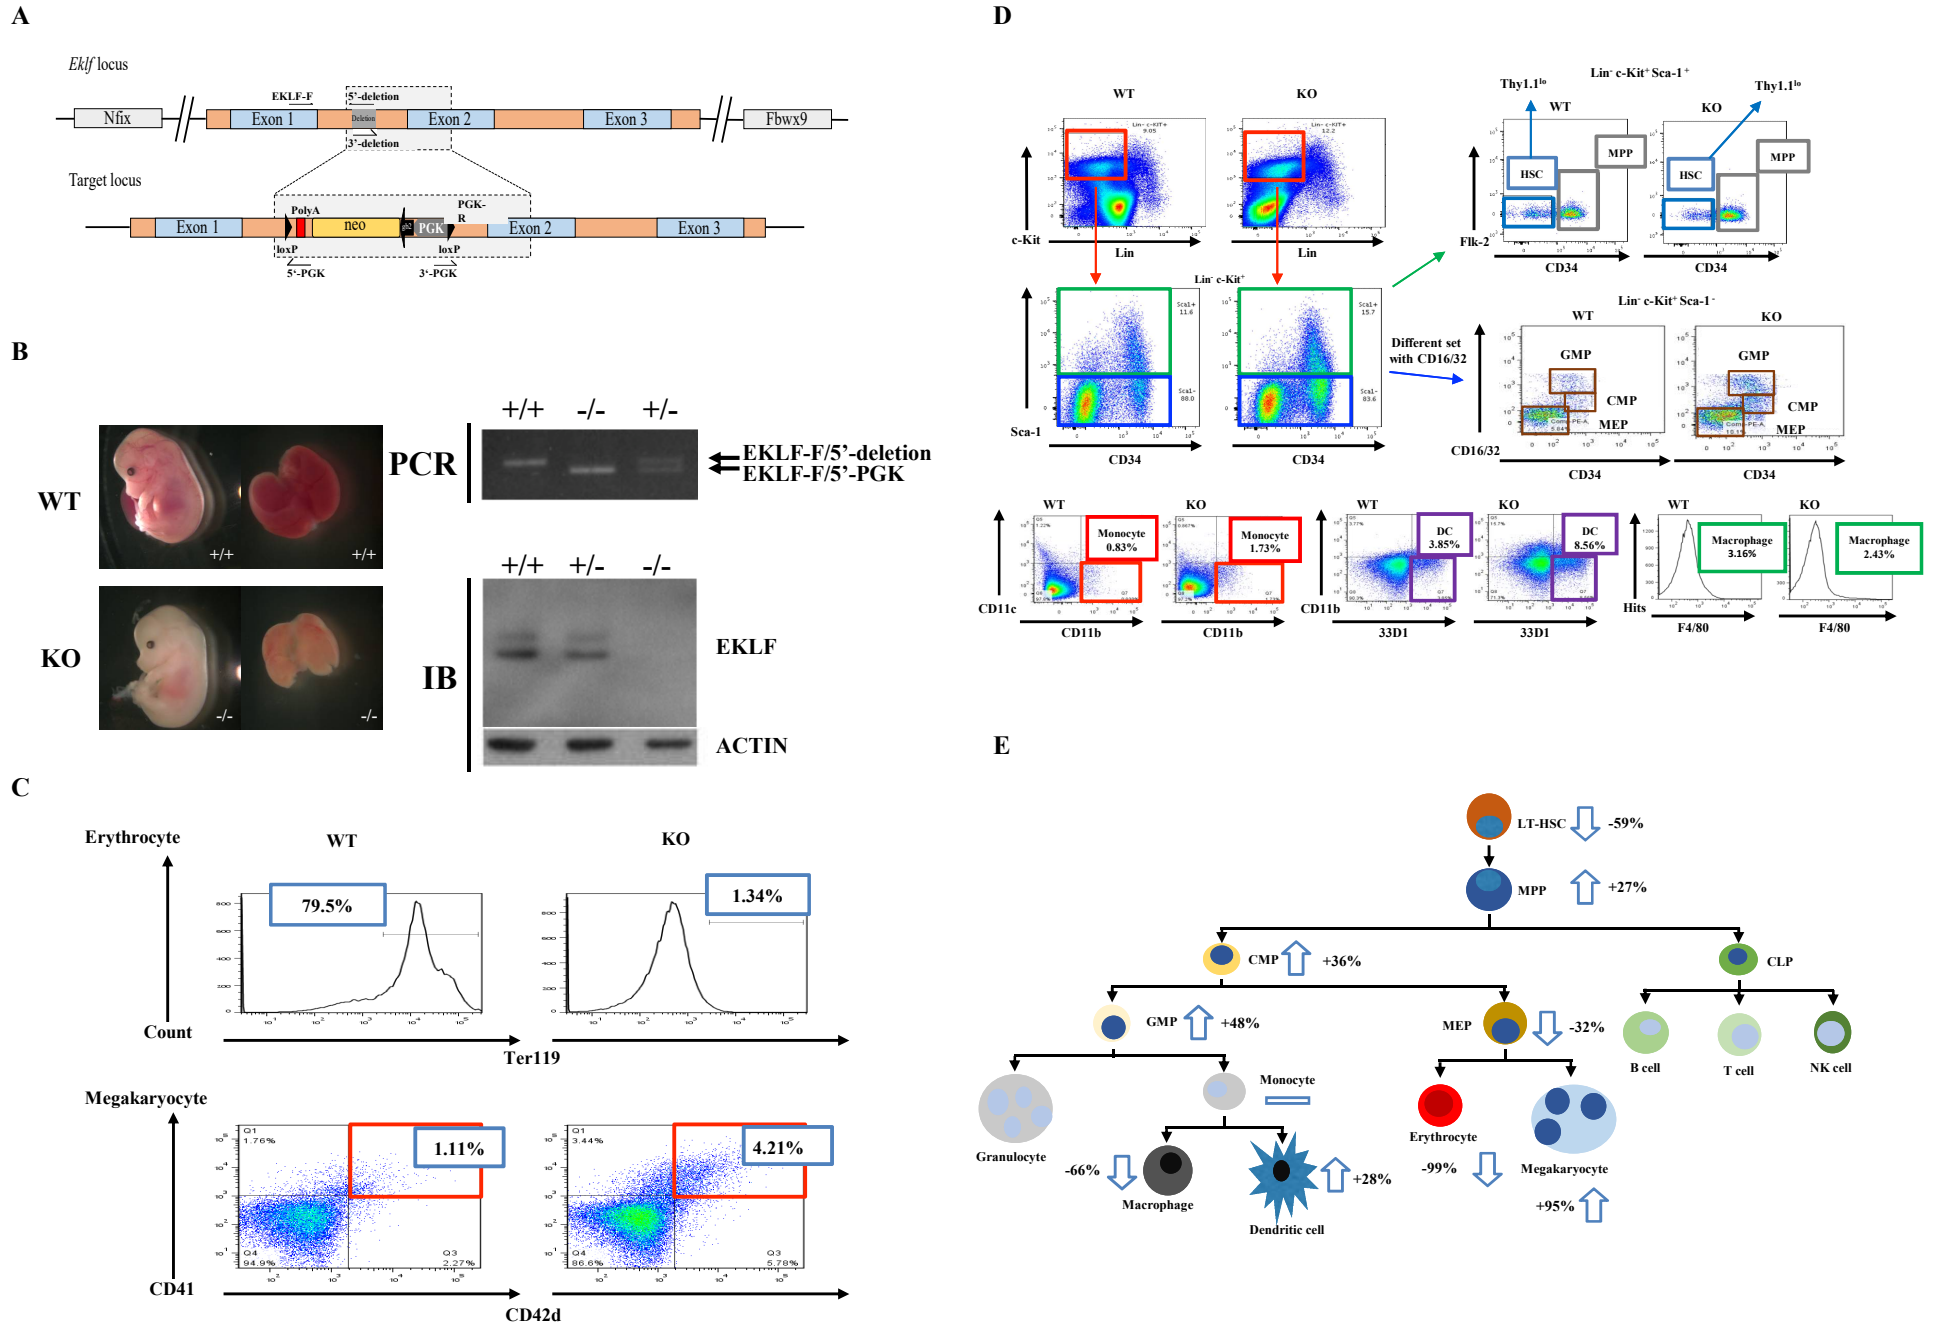

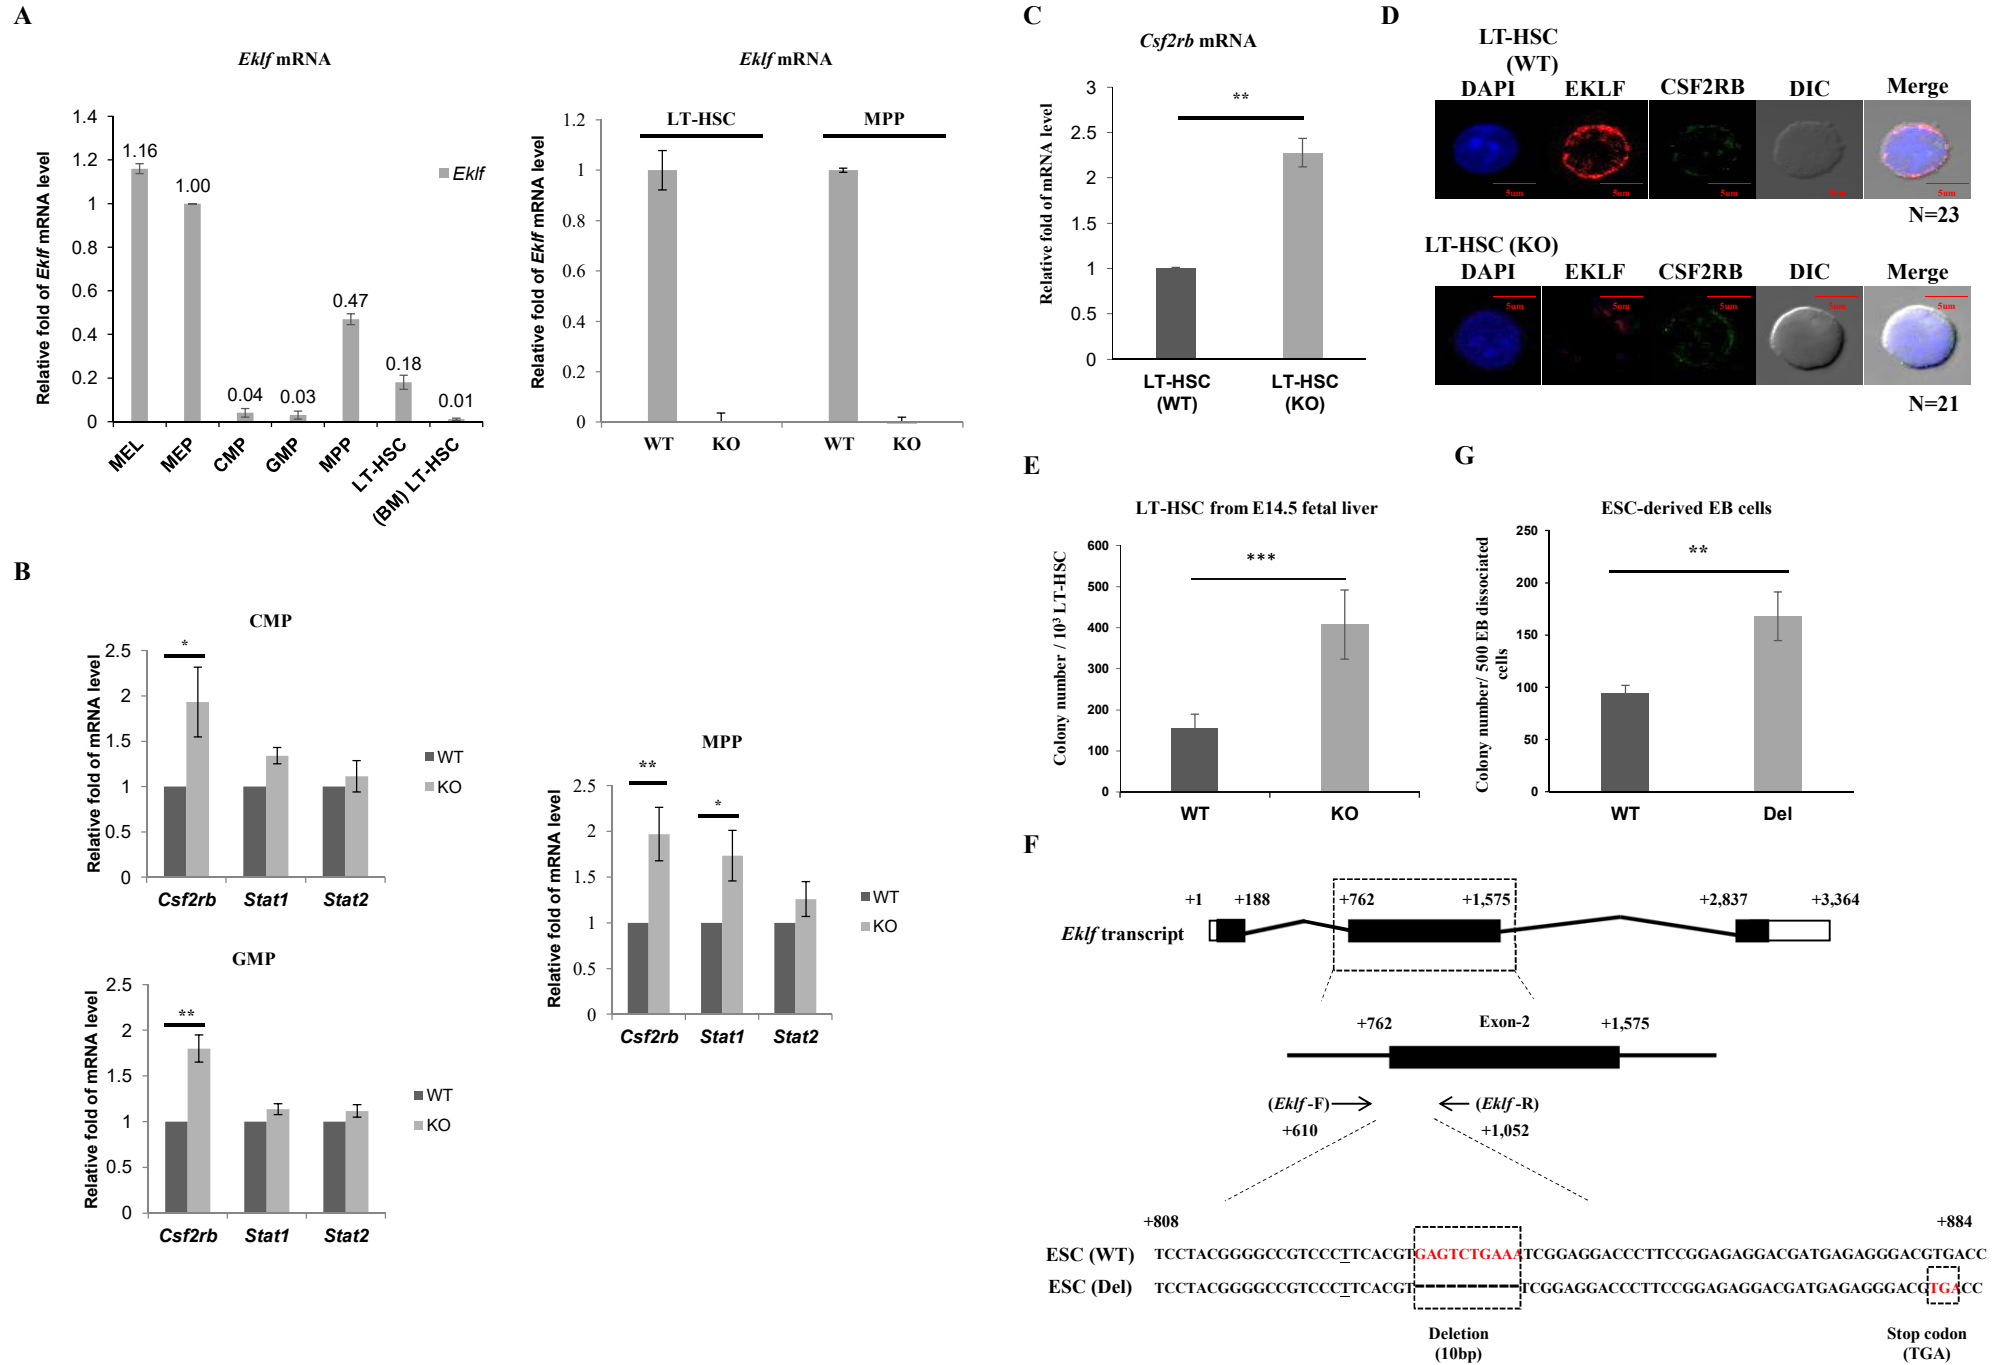

A

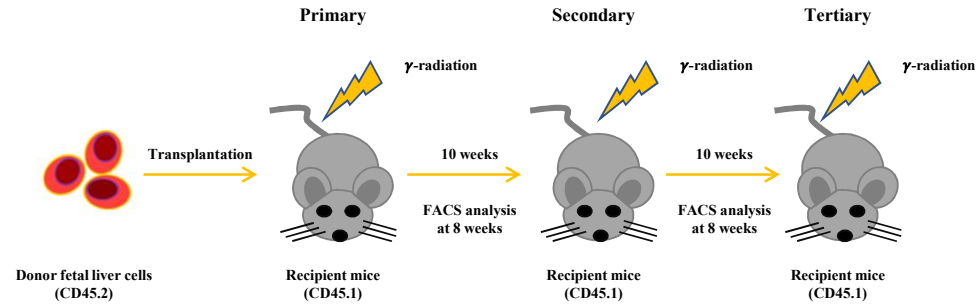

B

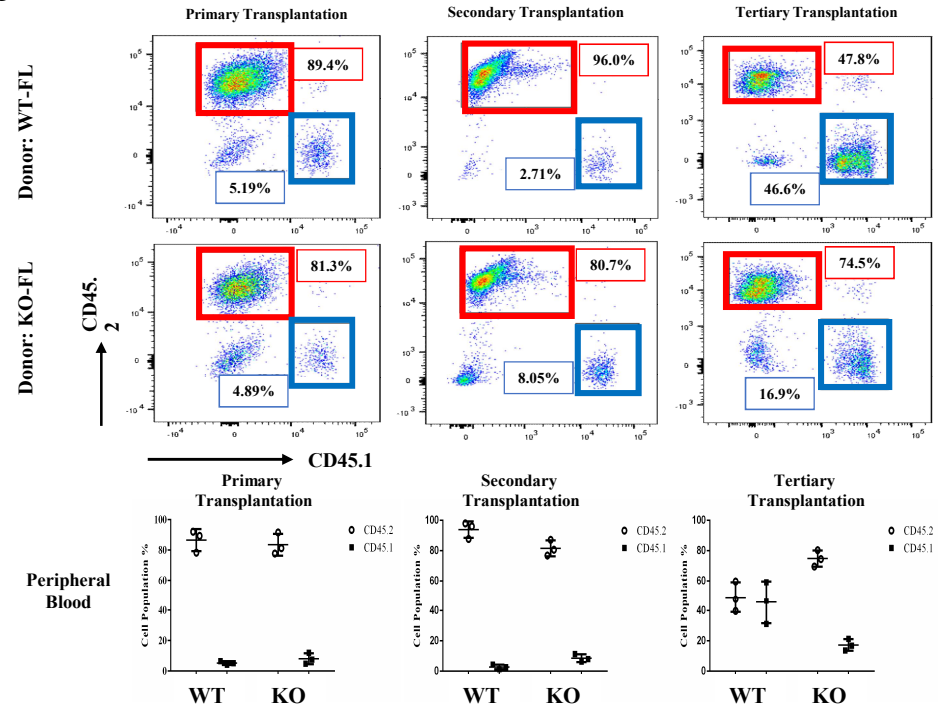

C

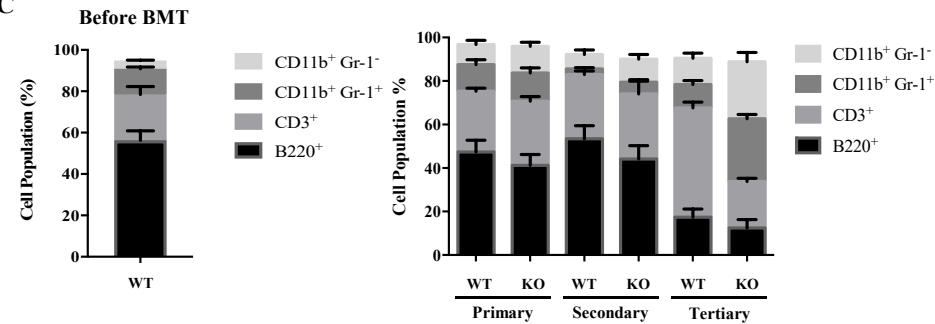

A

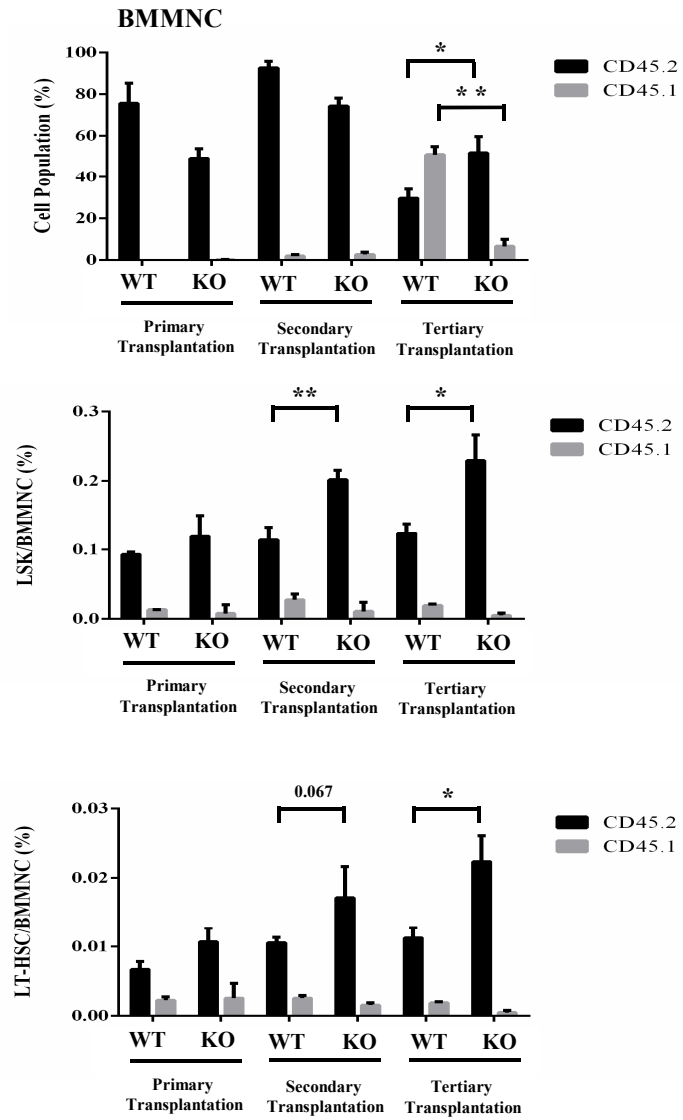

B

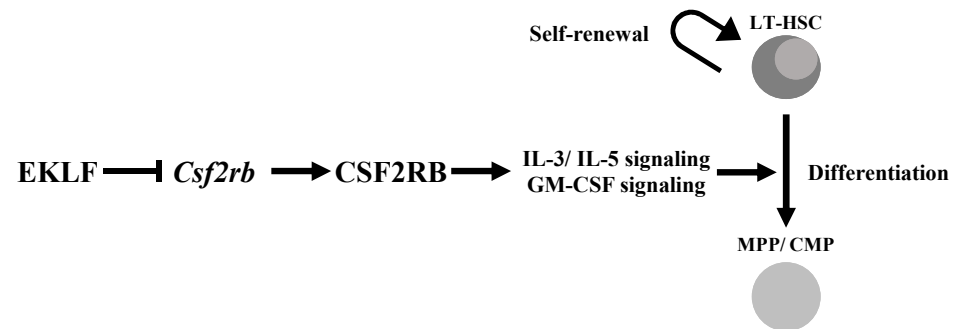

**Supplementary Table 1.** Number/ fetal liver of different types of hematopoietic cells in E14.5 fetal livers from WT and *Eklf*<sup>-/-</sup> embryos, respectively

|                                                        | <b>Cell number x10<sup>6</sup> / E14.5 Fetal Liver</b> |                 |
|--------------------------------------------------------|--------------------------------------------------------|-----------------|
| <b>Cell Types</b>                                      | WT                                                     | KO              |
| <b>Erythrocyte</b>                                     | 23.4±0.02                                              | 0.2±0.03 (-99%) |
| <b>Cell number x10<sup>3</sup> / E14.5 Fetal Liver</b> |                                                        |                 |
| <b>Cell Types</b>                                      | WT                                                     | KO              |
| <b>LT-HSC</b>                                          | 7.1±1.2                                                | 2.9±0.3 (-59%)  |
| <b>MPP</b>                                             | 19.0±3.5                                               | 24.3±2.0 (+27%) |
| <b>LSK</b>                                             | 26.1±3.2                                               | 27.2±3.3 (+4%)  |
| <b>Cell number x10<sup>4</sup> / E14.5 Fetal Liver</b> |                                                        |                 |
| <b>CMP</b>                                             | 14.7±2.7                                               | 19.9±2.9 (+36%) |
| <b>GMP</b>                                             | 26.6±6.3                                               | 39.6±7.7 (+48%) |
| <b>MEP</b>                                             | 31.9±4.4                                               | 21.5±1.5 (-32%) |
| <b>Cell number x10<sup>5</sup> / E14.5 Fetal Liver</b> |                                                        |                 |
| <b>Monocyte</b>                                        | 6.8±0.7                                                | 6.9±1.0 (+1.5%) |
| <b>Macrophage</b>                                      | 7.7±1.7                                                | 2.6±1.2 (-66%)  |
| <b>Megakaryocyte</b>                                   | 32.9±2.3                                               | 64.4±5.4 (+95%) |
| <b>Dendritic cell</b>                                  | 15.2±2.0                                               | 19.6±0.9 (+28%) |

The E14.5 fetal liver cells were analyzed by FACS, and the average cell number/ fetal liver of each cell types is presented. Differences of the cell numbers of the KO fetal liver relative to the WT fetal liver are shown in the parentheses as percentages (%) which are also shown in Fig 1E. N≥6

**Supplementary Table 2.** List of surface markers used for detection and/or sorting of different types of hematopoietic cells from fetal liver, bone marrow or peripheral blood

| Cell type       | Surface Markers                                                                                                    |
|-----------------|--------------------------------------------------------------------------------------------------------------------|
| LT-HSC          | Lin <sup>-</sup> c-Kit <sup>+</sup> Sca-1 <sup>+</sup> (Thy1.1 <sup>lo</sup> ) Flk2 <sup>-</sup> CD34 <sup>-</sup> |
| BM LT-HSC       | Lin <sup>-</sup> c-Kit <sup>+</sup> Sca-1 <sup>+</sup> Flk2 <sup>-</sup> CD34 <sup>-</sup>                         |
| MPP             | Lin <sup>-</sup> c-Kit <sup>+</sup> Sca-1 <sup>+</sup> (Thy1.1 <sup>-</sup> ) Flk2 <sup>+</sup> CD34 <sup>+</sup>  |
| CMP             | Lin <sup>-</sup> c-Kit <sup>+</sup> Sca-1 <sup>-</sup> CD34 <sup>+</sup> CD16/32 <sup>int</sup>                    |
| GMP             | Lin <sup>-</sup> c-Kit <sup>+</sup> Sca-1 <sup>-</sup> CD34 <sup>+</sup> CD16/32 <sup>hi</sup>                     |
| MEP             | Lin <sup>-</sup> c-Kit <sup>+</sup> Sca-1 <sup>-</sup> CD34 <sup>-</sup> CD16/32 <sup>lo/int</sup>                 |
| Monocyte        | CD11b <sup>+</sup> CD11c <sup>-</sup> or CD11b <sup>+</sup> Gr-1 <sup>-</sup>                                      |
| Macrophage      | F4/80 <sup>+</sup>                                                                                                 |
| Dendritic cells | CD11b <sup>-</sup> 33D1 <sup>+</sup>                                                                               |
| Erythrocyte     | Ter119 <sup>+</sup>                                                                                                |
| Megakaryocyte   | CD41 <sup>+</sup> CD42d <sup>+</sup>                                                                               |
| Granulocyte     | CD11b <sup>hi</sup> Gr-1 <sup>hi</sup> or CD11b <sup>+</sup> Gr-1 <sup>+</sup>                                     |
| T cells         | CD3 <sup>+</sup>                                                                                                   |
| B cells         | B220 <sup>+</sup>                                                                                                  |

**Supplementary Table 3.** List of PCR primers used in RT-qPCR analysis of the mRNAs and sequences of the DNA oligos used for CRISPR/Cas9 editing of ES cells

|               | Forward                     | Reverse                      |
|---------------|-----------------------------|------------------------------|
| <i>Eklf</i>   | 5'-GGACACCCAGGAGGACTTC-3'   | 5'-GGGCCTCCGATTCAGACTCA-3'   |
| <i>Actin</i>  | 5'-ATGGAGGGGAATACAGCCC-3'   | 5'-TTCTTTGCAGCTCCTTCGT-3'    |
| <i>Csf2rb</i> | 5'-ACAGAGAACCTAGATCGAGCC-3' | 5'-GTGTACTCTTCGCTCCACTTG-3'  |
| <i>Stat1</i>  | 5'-CTGAATATTTCCCTCCTGGG -3' | 5'-TCCCGTACAGATGTCCATGAT-3'  |
| <i>Stat2</i>  | 5'-GCTGTCAAGGTTCTGCAACA-3'  | 5'-CGCTTGAGAATTGGAAGTT-3'    |
| <i>Fcer1a</i> | 5'-GAGTGCCACCGTTCAAGACA-3'  | 5'-GTAGATCACCTTGCGGACATTC-3' |

| Name                | Sequence                       | Applications                                             |
|---------------------|--------------------------------|----------------------------------------------------------|
| <i>Eklf</i> -gRNA-F | 5'-acctTCACGTGAGTCTGAAATCGG-3' | Construction of the <i>Eklf</i> -gRNA expression plasmid |
| <i>Eklf</i> -gRNA-R | 5'-aacCCGATTCAGACTCACGTGA-3'   |                                                          |
| <i>Eklf</i> -F      | 5'-CTAGCAAGACCTAATGGAGTTGTC-3' | PCR across the Cas9/gRNA target site of <i>Eklf</i>      |
| <i>Eklf</i> -R      | 5'-CAAAGGCCCAGTCACCAACC-3'     |                                                          |

**F-forward primer/ R-reverse primer**
